# Supplementary material for: Dopamine receptor 1-expressing cells in the ventral hippocampus encode cocaine-context associations
Source: Research Square preprint supplement (doi:10.21203/rs.3.rs-8079719/v1), 2025-11-25
Supplement: Supplementary file 1 [file cdbfbd5f090b2e3f32fdb858.pdf]

## Supplementary Figures

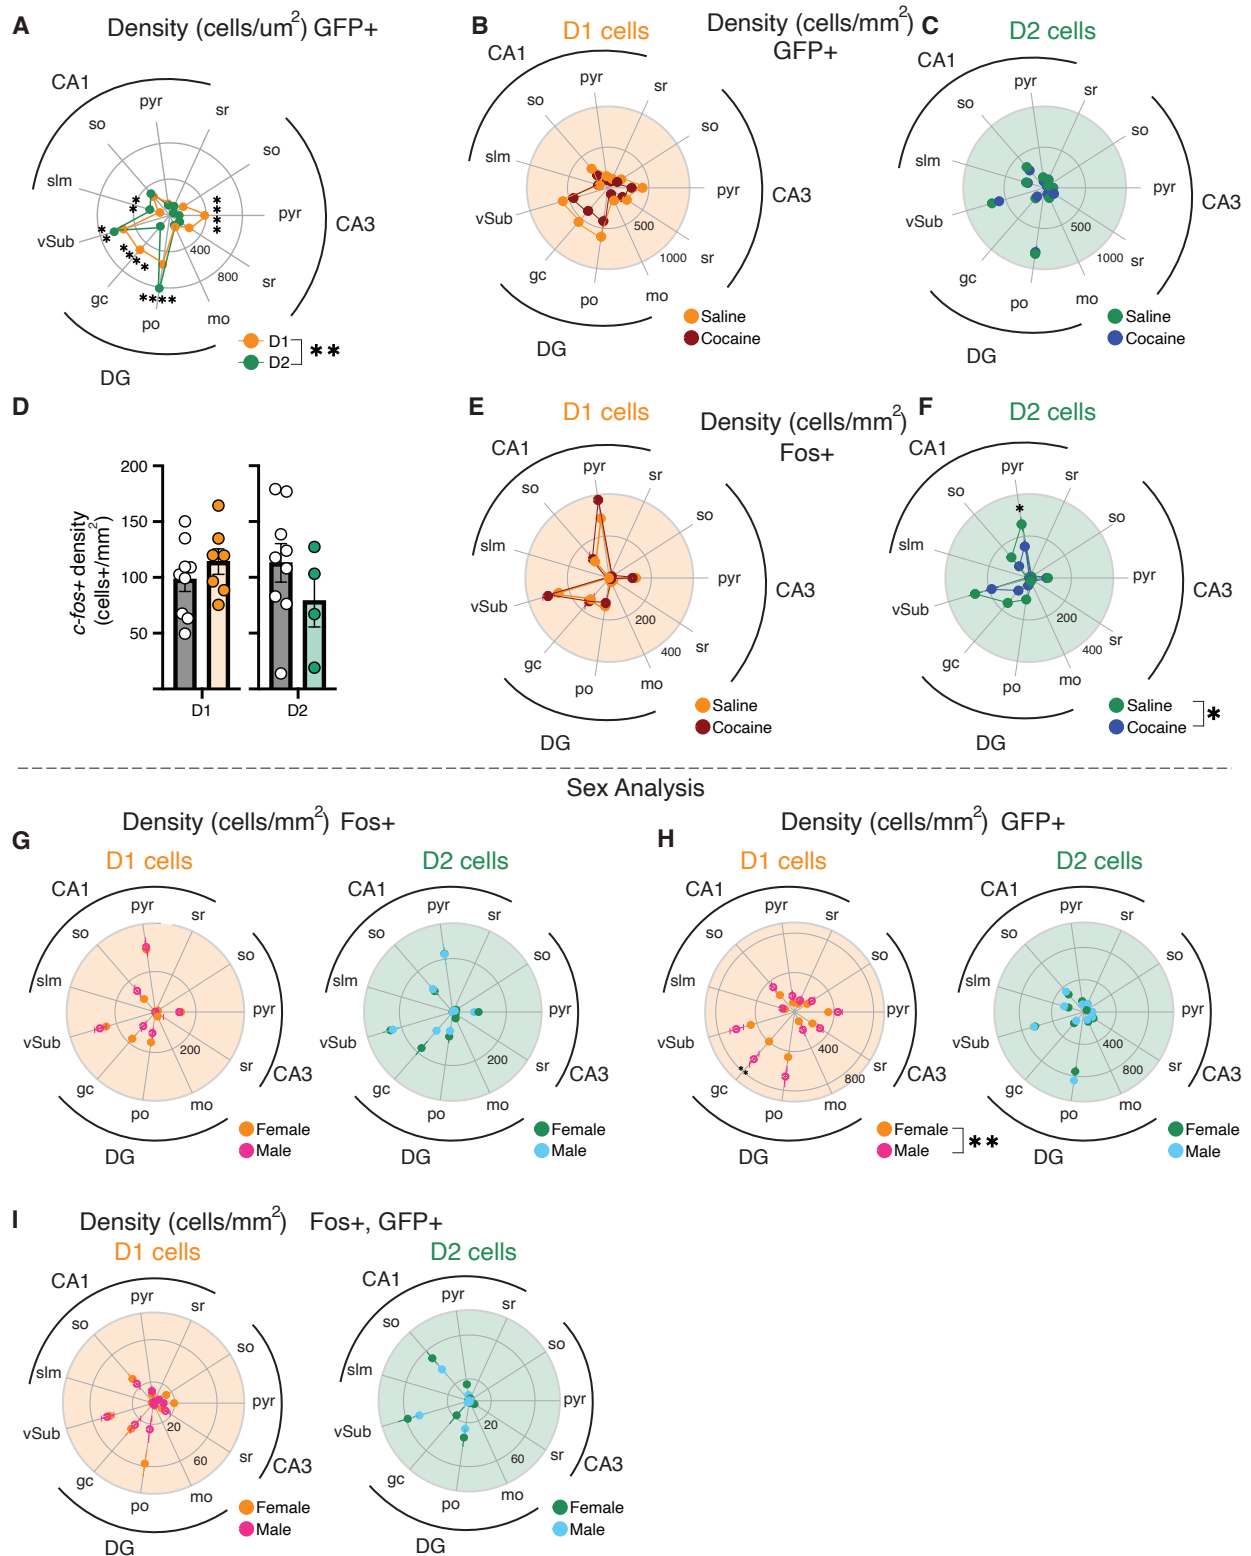

Fig. S1. Sex-specific analysis of FOS+ induction in vHPC D1 and D2 cells following acute cocaine injection.

- A) Density of D1 vs. D2-expressing cells (GFP+) across vHPC layers.
- B) Proportion of D1 (GFP+) cells following cocaine treatment.
- C) Proportion of D2 (GFP+) cells after cocaine.
- D) Average FOS+ expression in vHPC after cocaine injection.
- E) FOS expression across vHPC layers in D1 mice.
- F) FOS expression across vHPC layers in D2 mice.
- G) FOS+ density in D1 and D2 cells across sex.
- H) Density of D1 or D2 cells (GFP+) across sex.
- I) Density of co-localized FOS and GFP expression across sex.

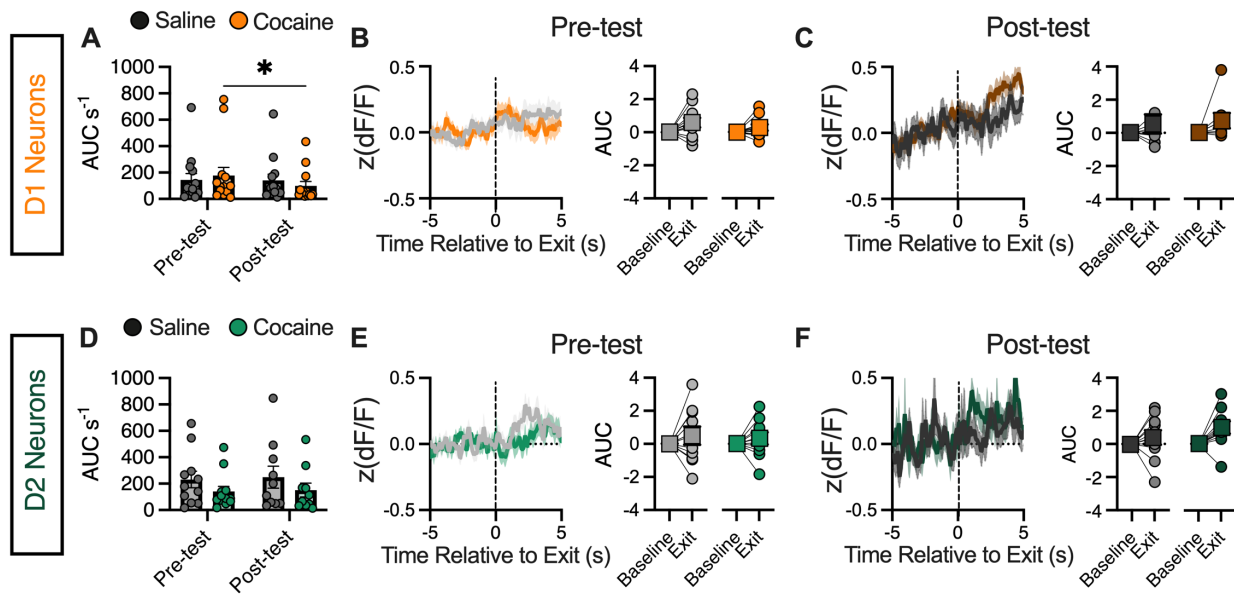

Fig. S2. Exit of saline- or cocaine-paired compartments during CPP has no effect on dopaminergic cell activity.

- A) Area under the curve (AUC) of D1 activity while mice are in saline or cocaine-paired compartment (P=0.0242; 2-Way ANOVA).
- B) Change in D1 signal when mice exit saline or cocaine paired side and resulting AUC.
- C) Change in D1 signal when mice exit saline or cocaine paired side during post-test and AUC.
- D) AUC of D2 activity while mice are in saline or cocaine-paired compartments.
- E) Change in D2 signal when mice exit saline or cocaine paired side and resulting AUC.
- F) Change in D1 signal when mice exit saline or cocaine paired side during post-test and AUC.

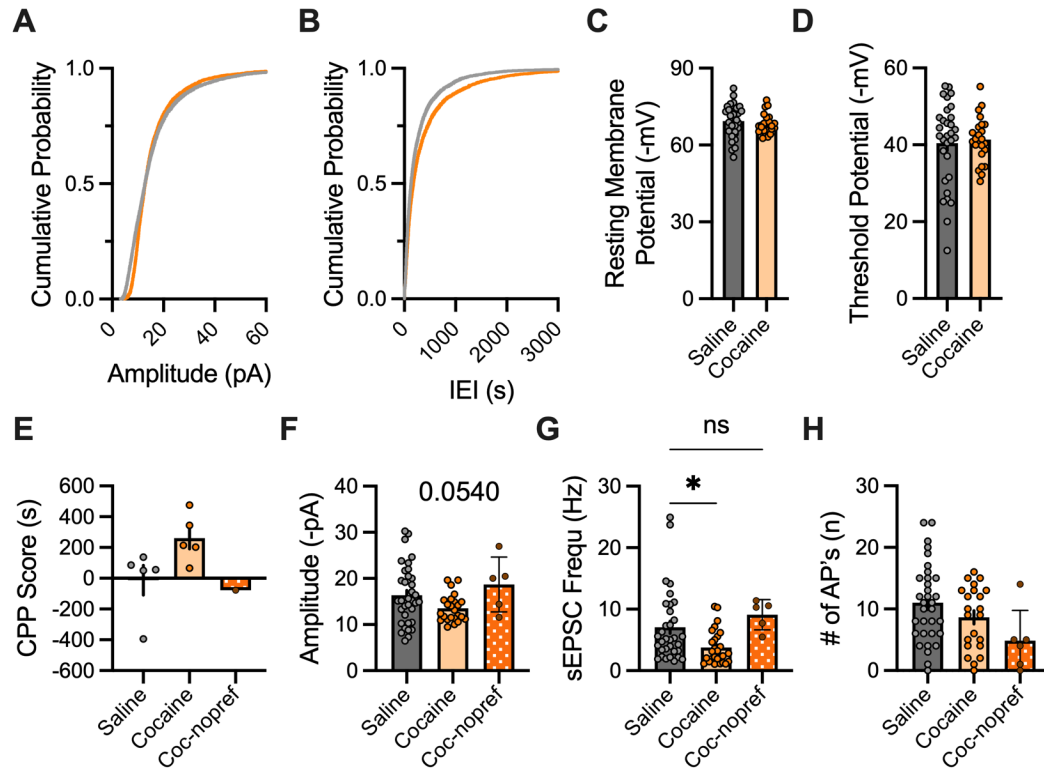

Fig. S3. Mice that do not form CPP do not show synaptic changes onto vHPC D1 cells.

- A) Cumulative probability of sEPSC amplitude from D1-tdtomato cells in the vHPC.
- B) Cumulative probability of sEPSC interevent interval (IEI).
- C) Resting membrane potential.
- D) Threshold potential.
- E) CPP score.
- F) sEPSC amplitude comparing data from Figure 2 with mouse that did not form preference.
- G) sEPSC frequency comparing data from Figure 2 with mouse that did not form preference ( $P=0.0084$ ; One-Way ANOVA).
- H) Excitability at 80 pA current step injections comparing data from Figure 2 with mouse that did not form preference.

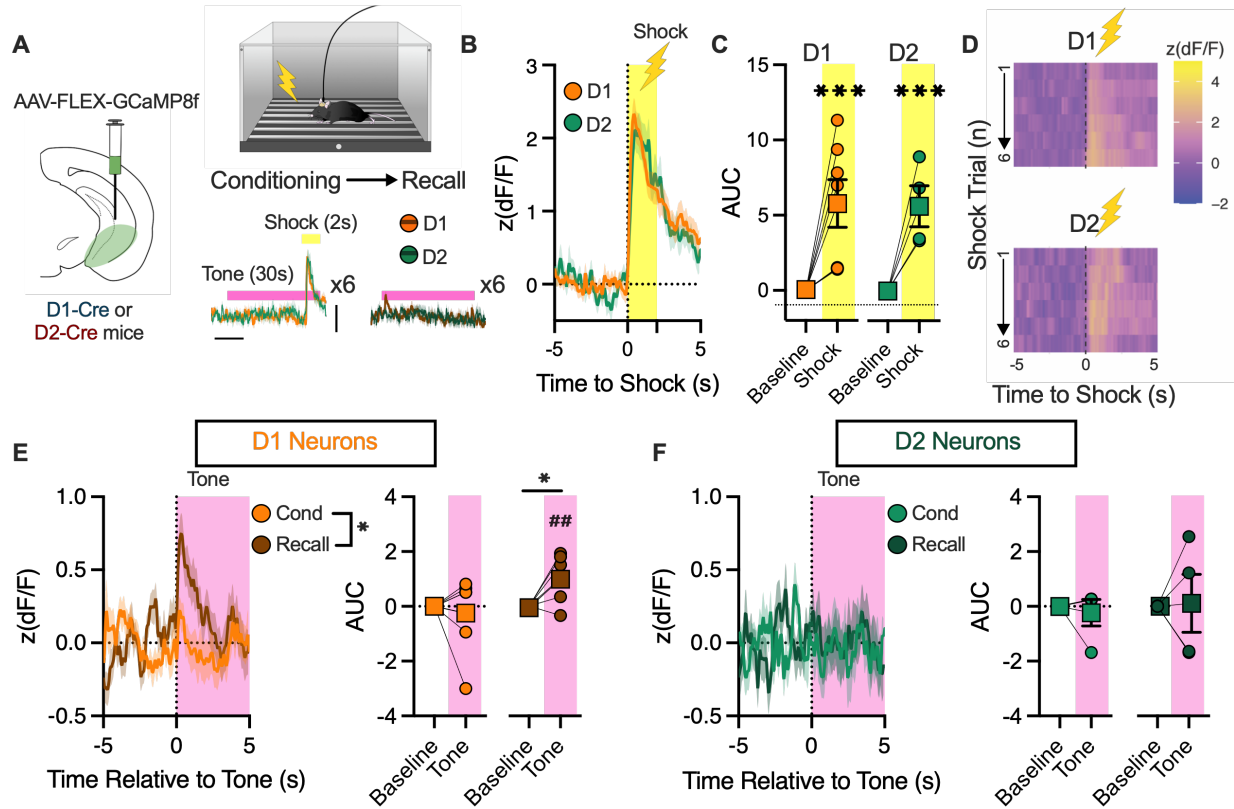

Fig. S4. D1 cells are inhibited by aversive conditioned cues.

- Schematic of experimental design for fear conditioning experiments and representative D1 and D2 cell activity.
- Average D1 and D2 responses to footshock.
- Resulting average AUC following footshock ( $P_{\text{Shock}}=0.0010$ , 2-Way ANOVA).
- Average heatmap of D1 (top) and D2 (bottom) responses to footshock across trial.
- Change in D1 activity in response to tone during conditioning and recall (left) and resulting AUC (right) ( $P_{\text{Day} \times \text{Tone}} = 0.04184$ , 2-Way ANOVA).
- Change in D2 activity in response to tone during conditioning and recall (left) and resulting AUC (right) ( $P_{\text{Day} \times \text{Tone}} = 0.8057$ ).

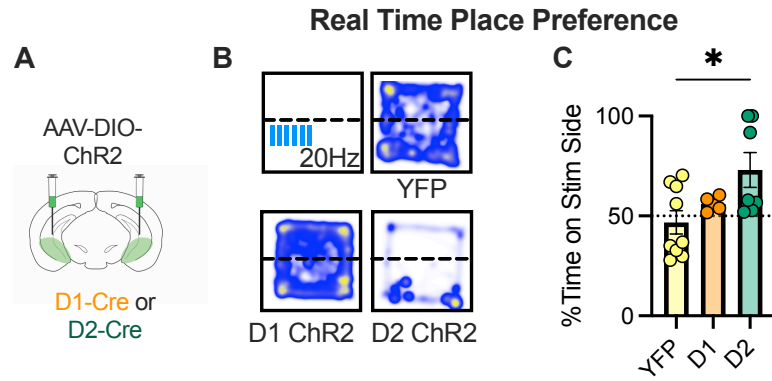

Fig. S5. Optogenetic activation of D2 cells is rewarding.

A) Schematic of optogenetic activation (YFP,  $n=9$ ; D1-ChR2,  $n=5$ , D2-ChR2,  $n=7$ ).

B) Representative heatmap of time spent in open field box during real time place preference.

C) Quantification of %time spent on side paired with optogenetic stimulation ( $P=0.0287$ , One-Way ANOVA).

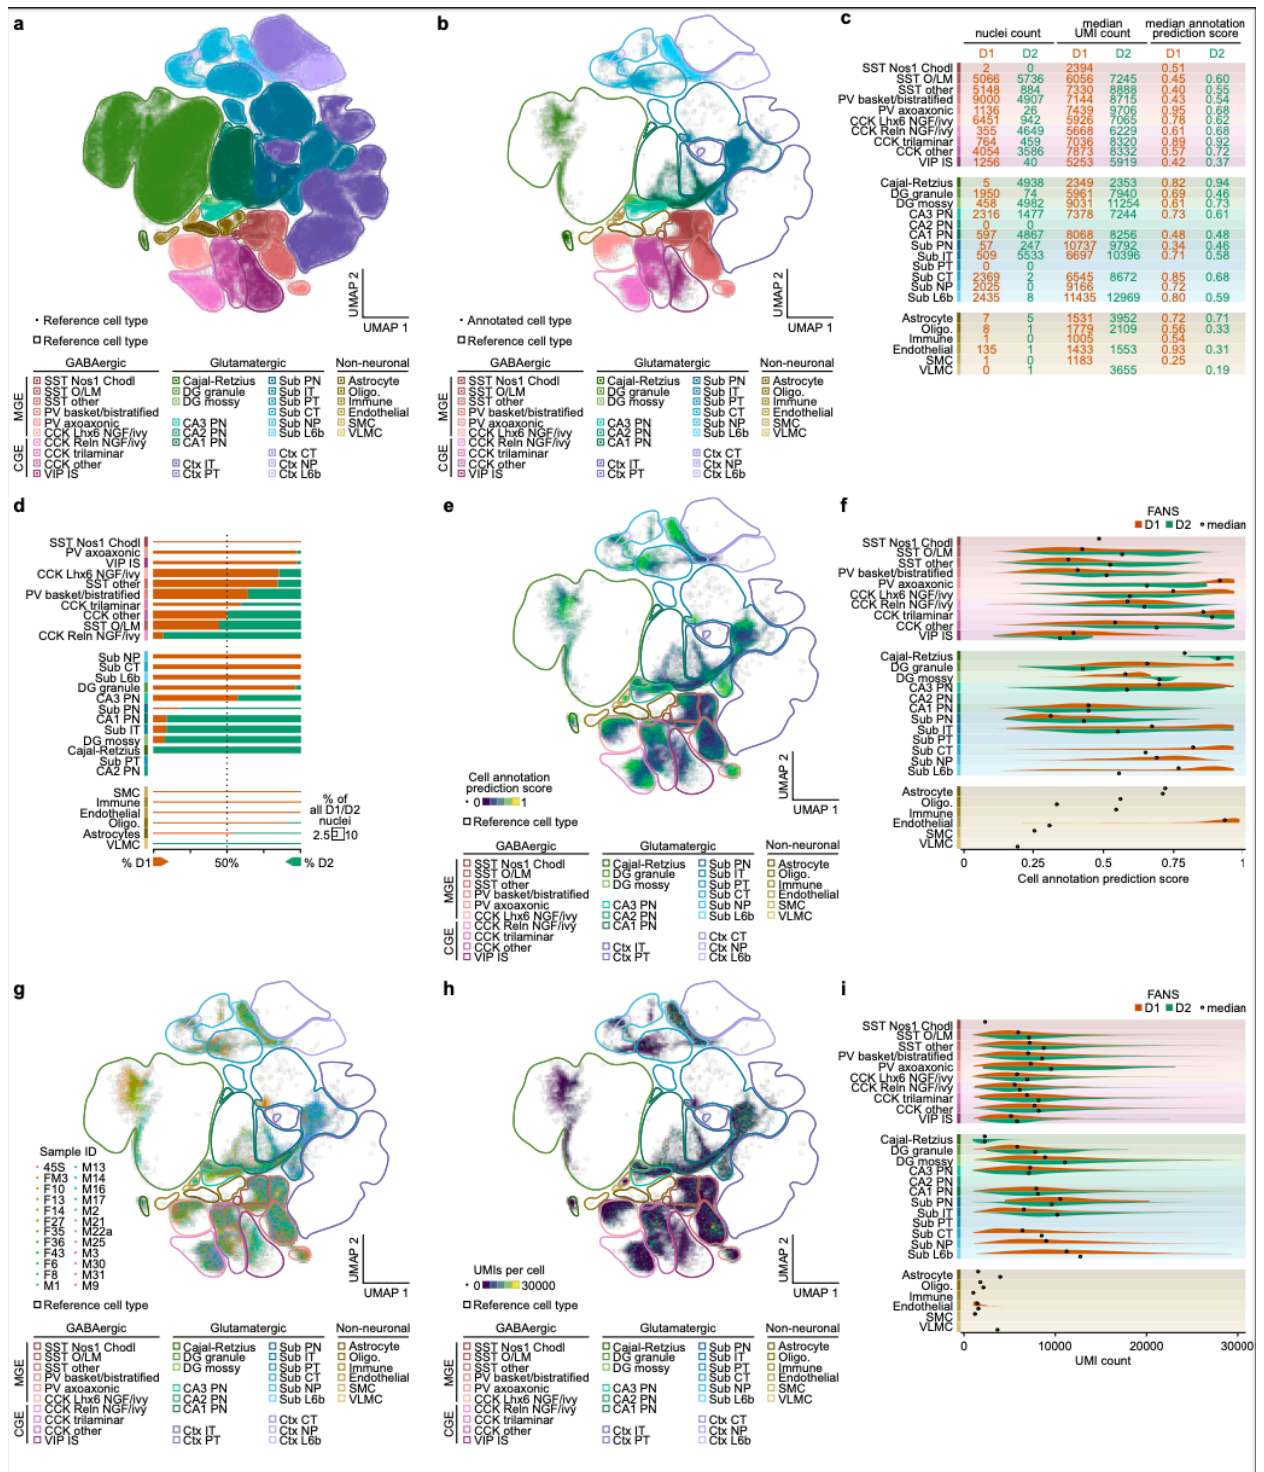

Fig. S6. Clustering vHPC D1 and D2 cells by use of snRNAseq.

- UMAP of reference data set.
- UMAP of sorted vHPC D1 and D2 cells using reference data set.
- Prediction scores for annotated D1 and D2 cells using reference data set.
- Proportion of D1 verse D2 cells across cell-type.
- Prediction scores using reference data set to cluster cells.

- F) Annotation prediction scores.
- G) UMAP of cell distributions across sample.
- H) UMAP of UMIs.
- I) UMI count across cluster.

This clustering utilized Yao, et al. 2021<sup>23</sup> as the reference data set.





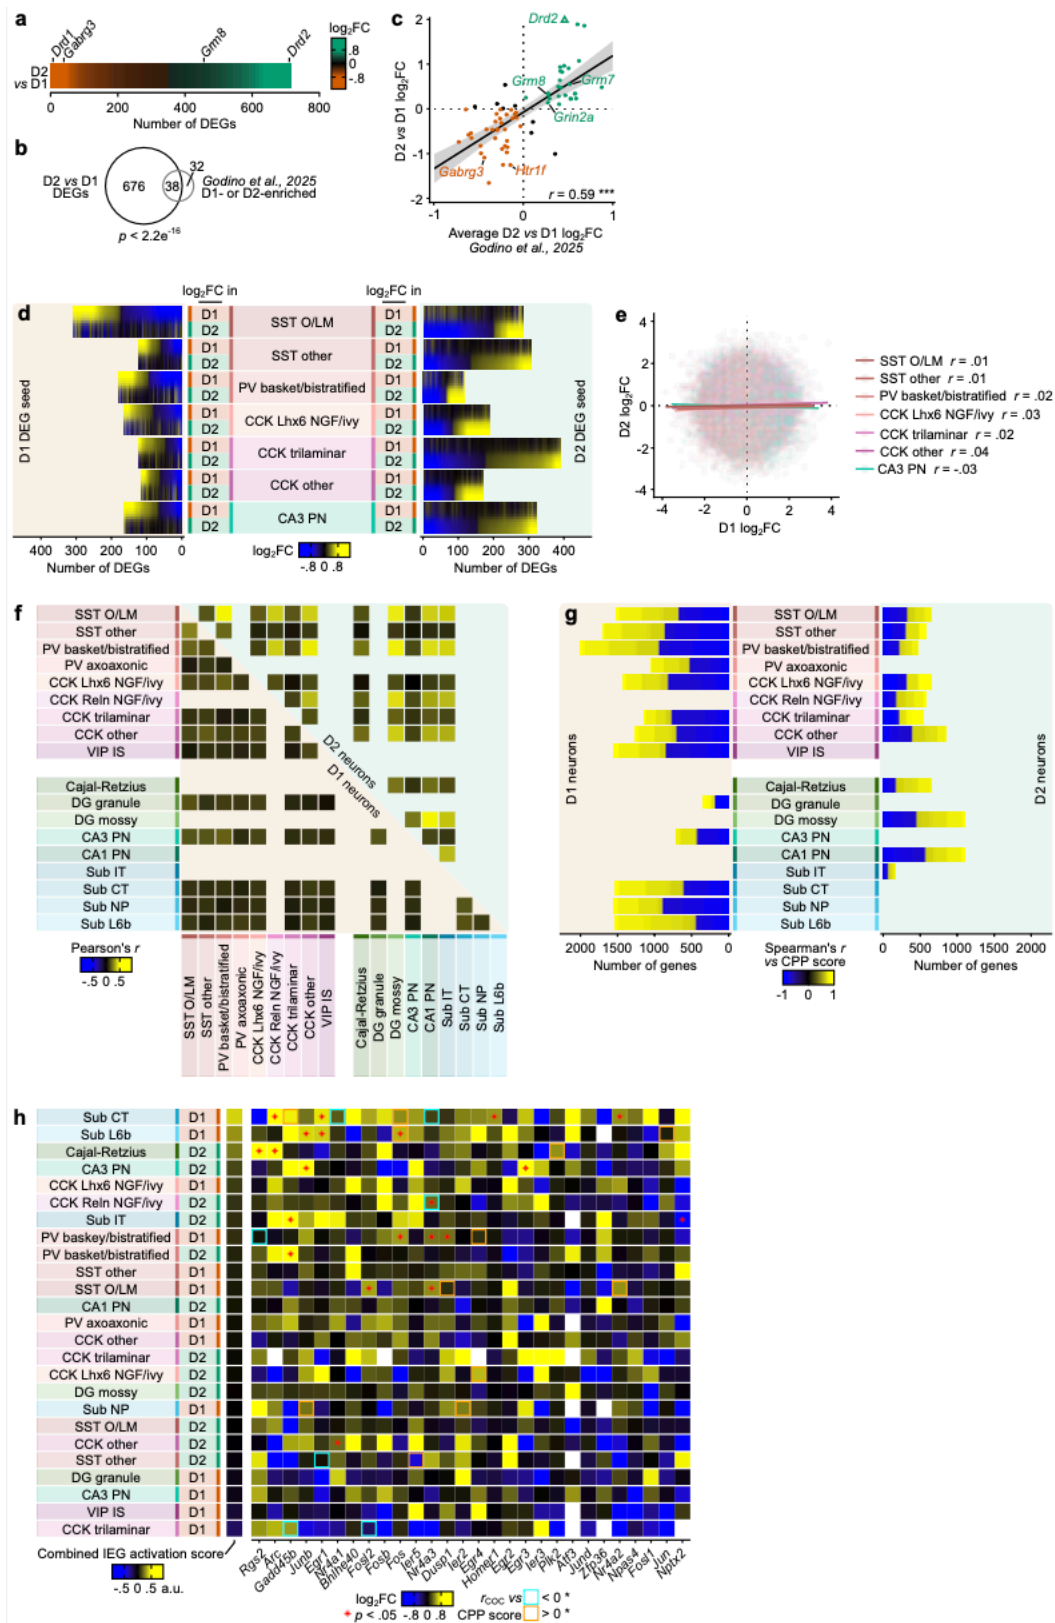

Fig. S8. D1 and D2 vHPC cells represent distinct cell types, yet cocaine-activated gene patterns are conserved across dopaminoceptive cell identity.

- A) Heatmap of DEGs comparing D1 vs. D2.
- B) Comparison to previously published DEGs between D1 and D2.
- C) Correlations with dataset obtained here to previously published<sup>15</sup>.
- D) Heatmap of log2foldchange comparing D1 and D2 DEGs.
- E) Correlations of changes in gene expression between D1 and D2 subclusters.
- F) Correlations of gene changes induced by cocaine CPP in D1 and D2 clusters.
- G) Number of DEGs correlated with CPP score.
- H) Immediate early gene (IEG) induction following cocaine CPP in D1 and D2 subclusters and correlations with CPP score.
